# Supplementary material for: Cartilage Collagen Neoepitope C2C Expression in the Articular Cartilage and Its Relation to Joint Tissue Damage in Patients with Knee Osteoarthritis
Source: MDPI journal article supplement (doi:10.3390/biomedicines12051063), 2024-05-11
Supplement: s1 [file s1]

## Supplementary Data

**Table S1.** Patients' characteristics and results of histopathology assessments and C2C staining. F—female patients; M—male patients; LTM—lateral tibial plateau, meniscus-covered area biopsy; MTM—medial tibial plateau, meniscus-covered area biopsy; \* Due to technical problems, no MTM sample was obtained from patient 6.

| No of patient | Gender | Age (years) | Tibial plateau site | OARSI histo-grade | Macroscopic damage (stage) | OARSI score (grade × stage) | Assessment of C2C staining, % |
|---------------|--------|-------------|---------------------|-------------------|----------------------------|-----------------------------|-------------------------------|
| 1             | F      | 60          | LTM                 | 6                 | 2                          | 12                          | 57.8                          |
|               |        |             | MTM                 | 3.5               |                            | 7                           | 93.7                          |
| 2             | M      | 58          | LTM                 | 3.5               | 3                          | 10.5                        | 28.2                          |
|               |        |             | MTM                 | 1.5               |                            | 4.5                         | 80                            |
| 3             | F      | 58          | LTM                 | 2.5               | 3                          | 7.5                         | 87.3                          |
|               |        |             | MTM                 | 2.5               |                            | 7.5                         | 60.7                          |
| 4             | F      | 65          | LTM                 | 3.5               | 3                          | 10.5                        | 90.8                          |
|               |        |             | MTM                 | 4.5               |                            | 13.5                        | 79.2                          |
| 5             | F      | 61          | LTM                 | 2.5               | 4                          | 10                          | 96.1                          |
|               |        |             | MTM                 | 6                 |                            | 24                          | 97.8                          |
| 6*            | M      | 59          | LTM                 | 2.5               | 1                          | 2.5                         | 51.7                          |
|               |        |             | MTM                 | -                 |                            | -                           | -                             |
| 7             | F      | 64          | LTM                 | 1.5               | 3                          | 4.5                         | 74.8                          |
|               |        |             | MTM                 | 4.5               |                            | 13.5                        | 52.1                          |
| 8             | F      | 65          | LTM                 | 3                 | 3                          | 9                           | 64.7                          |
|               |        |             | MTM                 | 4.5               |                            | 13.5                        | 99                            |
| 9             | F      | 65          | LTM                 | 4                 | 2                          | 8                           | 16.2                          |
|               |        |             | MTM                 | 3                 |                            | 6                           | 45.6                          |
| 10            | F      | 55          | LTM                 | 2.5               | 1                          | 2.5                         | 44.4                          |
|               |        |             | MTM                 | 2                 |                            | 2                           | 53.4                          |
| 11            | F      | 58          | LTM                 | 3                 | 2                          | 6                           | 52.9                          |
|               |        |             | MTM                 | 2.5               |                            | 5                           | 62.8                          |
| 12            | F      | 59          | LTM                 | 1.5               | 1                          | 1.5                         | 55.6                          |
|               |        |             | MTM                 | 2                 |                            | 2                           | 42.3                          |
| 13            | F      | 59          | LTM                 | 2.5               | 2                          | 5                           | 88.8                          |
|               |        |             | MTM                 | 4                 |                            | 8                           | 67.5                          |
| 14            | M      | 58          | LTM                 | 2                 | 3                          | 6                           | 47.2                          |
|               |        |             | MTM                 | 5.5               |                            | 16.5                        | 100                           |
| 15            | F      | 57          | LTM                 | 3                 | 2                          | 6                           | 71.5                          |
|               |        |             | MTM                 | 3                 |                            | 6                           | 79.7                          |
| 16            | F      | 63          | LTM                 | 2                 | 2                          | 4                           | 93.1                          |
|               |        |             | MTM                 | 2.5               |                            | 5                           | 79.5                          |
| 17            | M      | 55          | LTM                 | 1.5               | 2                          | 3                           | 50.8                          |
|               |        |             | MTM                 | 4.5               |                            | 9                           | 74.6                          |
| 18            | M      | 66          | LTM                 | 4.5               | 3                          | 13.5                        | 86.7                          |
|               |        |             | MTM                 | 5                 |                            | 15                          | 94.4                          |
| 19            | M      | 65          | LTM                 | 3.5               | 3                          | 10.5                        | 82.5                          |
|               |        |             | MTM                 | 3.5               |                            | 10.5                        | 91.2                          |
| 20            | M      | 58          | LTM                 | 0                 | 3                          | 0                           | 36.5                          |
|               |        |             | MTM                 | 3                 |                            | 9                           | 100                           |

|    |   |    |     |     |   |      |      |
|----|---|----|-----|-----|---|------|------|
| 21 | M | 62 | LTM | 4.5 | 3 | 13.5 | 29.5 |
|    |   |    | MTM | 5.5 |   | 16.5 | 80.9 |
| 22 | F | 60 | LTM | 4   | 2 | 8    | 60.4 |
|    |   |    | MTM | 1.5 |   | 3    | 69.8 |
| 23 | M | 58 | LTM | 2   | 2 | 4    | 90.2 |
|    |   |    | MTM | 4   |   | 8    | 73.5 |
| 24 | F | 65 | LTM | 2.5 | 2 | 5    | 44.8 |
|    |   |    | MTM | 4   |   | 8    | 81.2 |
| 25 | F | 56 | LTM | 3.5 | 3 | 10.5 | 60   |
|    |   |    | MTM | 6   |   | 18   | 99.1 |
| 26 | F | 63 | LTM | 2   | 4 | 8    | 73.2 |
|    |   |    | MTM | 6.5 |   | 26   | 73.1 |
| 27 | M | 59 | LTM | 2.5 | 2 | 5    | 69.2 |
|    |   |    | MTM | 3.5 |   | 7    | 95.9 |
